# Supplementary material for: Simple steatosis sensitizes cholestatic rats to liver injury and dysregulates bile salt synthesis and transport
Source: PubMed Central journal article supplement (PMC4989137; doi:10.1038/srep31829), 2016-08-18
Supplement: srep31829-s1.pdf [file srep31829-s1.pdf]

## SUPPLEMENTARY INFORMATION

### **Simple steatosis sensitizes cholestatic rats to liver injury and dysregulates bile salt synthesis and transport**

Daniël A. Lionarons<sup>1</sup>, Michal Heger<sup>1</sup>, Rowan F. van Golen<sup>1</sup>, Lindy K. Alles<sup>1</sup>,  
Vincent A. van der Mark<sup>1,2</sup>, Jaap J. Kloek<sup>1</sup>, Dirk R. de Waart<sup>2</sup>, Hendrik A.  
Marsman<sup>1</sup>, Henny Rusch<sup>3</sup>, Joanne Verheij<sup>4</sup>, Ulrich Beuers<sup>2</sup>, Coen C.  
Paulusma<sup>2</sup>, Thomas M. van Gulik<sup>1</sup>

*<sup>1</sup>Department of Experimental Surgery, <sup>2</sup>Tytgat Institute for Liver and Intestinal  
Research, <sup>3</sup>Laboratory Genetic Metabolic Diseases, and <sup>4</sup>Department of  
Pathology, Academic Medical Center, University of Amsterdam, Amsterdam,  
the Netherlands*

## Table of contents

|                                                |    |
|------------------------------------------------|----|
| Supplementary methods.....                     | 3  |
| Surgical procedures and tissue processing..... | 3  |
| Measurement of bile salt composition.....      | 4  |
| CYP7A1 regulation assay .....                  | 5  |
| Supplementary Fig. S1.....                     | 6  |
| Supplementary Fig. S2.....                     | 7  |
| Supplementary Fig. S3.....                     | 8  |
| Supplementary Fig. S4.....                     | 9  |
| Supplementary Fig. S5.....                     | 10 |
| Supplementary Fig. S6.....                     | 11 |
| Supplementary Table S1.....                    | 12 |
| Supplementary Table S2.....                    | 13 |
| References.....                                | 14 |

## Supplementary methods

### *Surgical procedures and tissue processing*

The animals were weighed before surgery. Surgery was performed under inhalation anesthesia comprising a mixture of oxygen:air (1:1 volume ratio, 2 L/min) and 2-4% isoflurane (Forene, Abbott Laboratories, Chicago, IL, USA). Animals received analgesia pre-operatively by subcutaneous administration of 250 µg/kg buprenorphine (Temgesic, Schering-Plough, Kenilworth, NJ, USA). Body temperature was maintained at  $37.0 \pm 0.2$  °C. A midline laparotomy was performed and the common bile duct was mobilized. In animals undergoing BDL, the common bile duct was ligated proximally and distally relative to the liver, and the lumen was disconnected in between. In animals undergoing sham surgery, the bile duct was manipulated but not ligated and not disconnected. The abdomen was closed with dual layer sutures.

After 7 days the animals were weighed, anesthetized as described, and euthanized by exsanguination from the vena cava. Blood samples were collected in heparin and EDTA. Liver tissue was snap-frozen in liquid nitrogen and stored at -80 °C for subsequent RNA extraction and HPLC (left lateral and median lobe), and MPO activity, TNF-alpha, and IL-6 measurements (right lateral and median lobe). Samples were also fixed in 10% buffered formalin for histological analysis. A sample from the caudal lobe was weighed, desiccated at 37° C for 4 weeks, and weighed again to determine hepatic water content. Intergroup differences in hepatic water content, calculated by  $[1 - (\text{dry weight}/\text{wet weight})] \times 100\%$ , were used as a measure of edema.

### *Measurement of bile salt composition*

Individual bile salt/acid species were separated and quantified by reverse-phase HPLC [1,2]. Twenty  $\mu\text{L}$  of plasma was mixed with 5 volumes of acetonitrile to precipitate protein. For liver samples,  $\sim 100$  mg tissue was sonicated in 5 volumes of  $\text{H}_2\text{O}$  for 30-90 s, followed by addition of 10 volumes of acetonitrile. Samples were centrifuged at  $20,000 \times g$  for 10 min. Solvent was evaporated from supernatants, bile salts/acids were solubilized in 200  $\mu\text{L}$  of 25% methanol, and 100  $\mu\text{L}$  was applied to a Hypersil C18 HPLC column (internal diameter: 3  $\mu\text{m}$ , length: 15 cm; Thermo Scientific, Waltham, MA, USA) operated at 20  $^\circ\text{C}$ . The starting eluent consisted of 6.8 mmol/L ammoniumformate (pH = 3.9), followed by linear gradient or isocratic elution with acetonitrile at the indicated concentration: 28% (1 min), 38% (13 min), 42% (19 min), 61% (20 min), 63% (25 min), 80% (28 min), 80% (31 min), and 0% (33 min). The flow rate was 0.8 mL/min. Detection was performed with an NQAD QT-500 (Quant Technologies, Blaine, MN, USA) and quantification was performed on the basis of calibration curves for all bile salt/acid species. We achieve good separation of the 17 relevant bile salt species present in rodents using this protocol, as demonstrated by a chromatogram (Supplementary Fig. S1). Total bile salt concentrations quantified using HPLC refer to the cumulative of all bile salts/acids, which were consistent with results from an enzyme cycling assay (Supplementary Fig. S4). The mean T $\beta$ MCA/TCA ratio was calculated by averaging ratios from individual animals.

### *CYP7A1 regulation assay*

HepG2-NTCP cells were cultured at 37 °C in humidified air with 5% CO<sub>2</sub> in Dulbecco's Modified Eagle's Medium (Lonza) supplemented with 10% fetal calf serum (Bodinco), 5 µg/mL insulin (Sigma), 50 µmol/L hydrocortisone hemisuccinate (Sigma), 100 IU/mL penicillin (Lonza), 0.1 mg/mL streptomycin (Lonza), and 2 mmol/L L-glutamine (Lonza). Cells were seeded in 24-well plates. When ~80% confluence was reached, cells were washed with PBS once and medium was changed to serum-free medium supplemented with 1% free fatty acid-free bovine serum albumin (Sigma) with or without addition of bile salts. Twenty-four hours after treatment, RNA was extracted using the RNeasy Mini Kit according to the manufacturer's instructions (Qiagen). Messenger RNA levels were quantified as described in the main article.

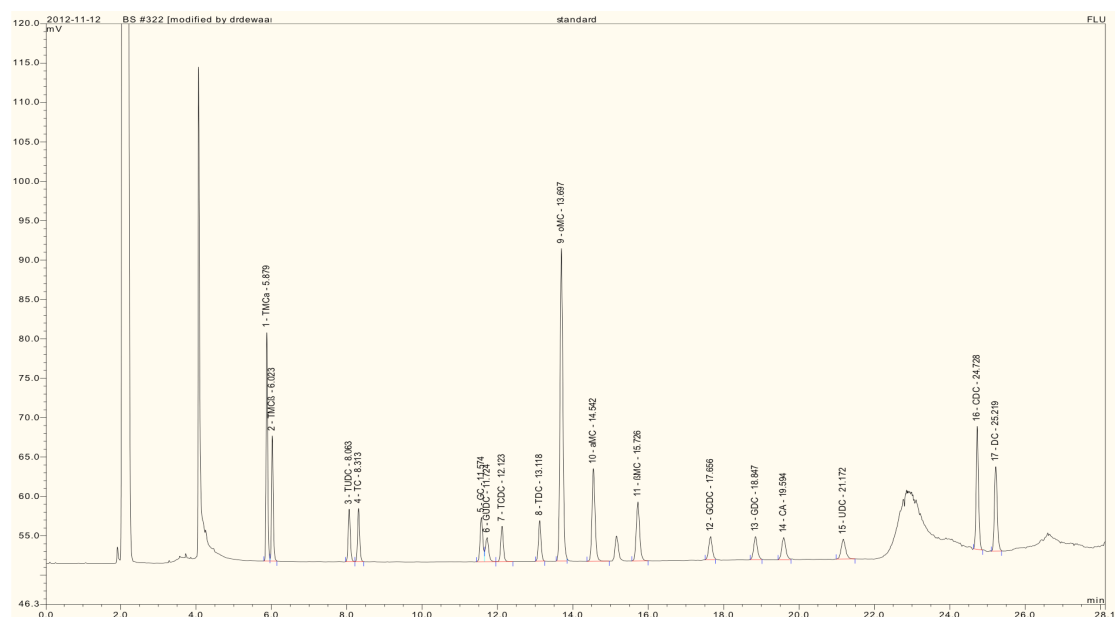

**Supplementary Fig. S1. Chromatogram of 17 bile salt/acid species that comprise the rodent bile salt composition.** These data demonstrate the complete separation of individual bile salt/acid species by HPLC. Litocholate appeared after 28 minutes and falls off this plot. Taurolitocholate eluted behind cholate as a separate peak (not shown). TMC $\alpha$ , tauro- $\alpha$ -muricholate; TMC $\beta$ , tauro- $\beta$ -muricholate; TUDC, tauroursodeoxycholate; TC, taurocholate; GC, glycocholate; GUDC, glyoursodeoxycholate; TCDC, taurochenodeoxycholate; TDC, taurodeoxycholate; oMC,  $\Omega$ -muricholate; aMC,  $\alpha$ -muricholate;  $\beta$ MC,  $\beta$ -muricholate; GCDC, glycochenodeoxycholate; GDC, glycodeoxycholate; CA, cholate; UDC, ursodeoxycholate; CDC, chenodeoxycholate; DC, deoxycholate.

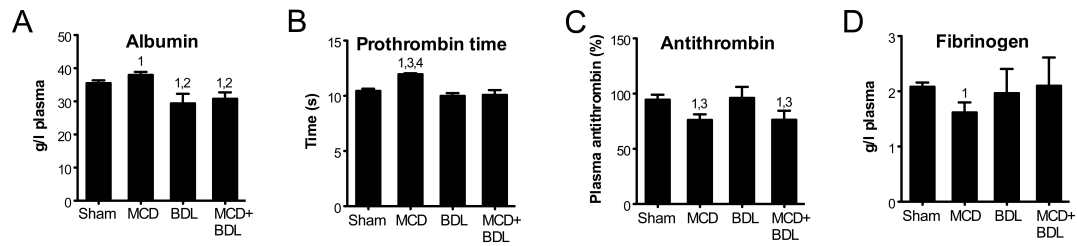

**Supplementary Fig. S2. The hepatic synthesis function of animals with combined steatosis and cholestasis was not uniformly impaired compared to cholestasis alone.** The liver synthesis function was assessed on the basis of (A) plasma albumin levels, (B) prothrombin time, (C) plasma antithrombin levels, and (D) plasma fibrinogen levels. Values represent mean  $\pm$  SD for  $n = 5-6$  per group. 1,  $p < 0.05$  versus sham; 2,  $p < 0.05$  versus MCD; 3,  $p < 0.05$  versus BDL; 4,  $p < 0.05$  versus MCD+BDL.

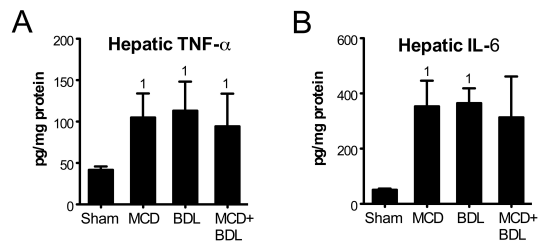

**Supplementary Fig. S3. Hepatic levels of pro-inflammatory cytokines were comparable in rats with steatosis, cholestasis, and combined steatosis and cholestasis.** Concentrations of TNF- $\alpha$  (A) and IL-6 (B) in liver homogenates were determined using an ELISA. Values represent means  $\pm$  SD for  $n = 5-6$  per group. 1,  $p < 0.05$  versus sham.



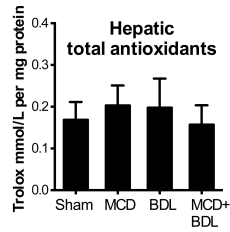

**Supplementary Fig. S4. The hepatic total antioxidant capacity is similar in the liver of sham control rats, rats with steatosis, cholestasis, and combined steatosis and cholestasis.** A total antioxidant capacity assay (Sigma) was performed as described previously [3]. There were no statistically significant differences detected between the 4 groups ( $p = 0.42$ ). Values represent means  $\pm$  SD for  $n = 5-6$  samples.

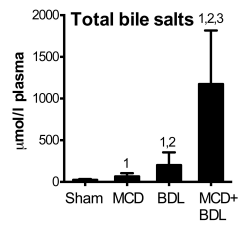

**Supplementary Fig. S5. Measurement of plasma total bile salts with an enzyme cycling assay.** The data are in line with HPLC results shown in Fig. 3B, indicating that plasma total bile salt levels were substantially elevated in animals with combined steatosis and cholestasis versus cholestasis ( $p < 0.001$ ). Values represent means  $\pm$  SD for  $n = 5-6$  samples. 1,  $p < 0.05$  versus sham; 2,  $p < 0.05$  versus MCD; 3,  $p < 0.05$  versus BDL.

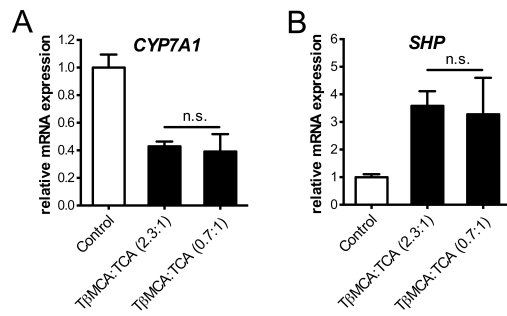

**Supplementary Fig. S6. Gene expression of *CYP7A1* and *SHP* in HepG2 cells treated with T $\beta$ MCA and TCA.** HepG2-NTCP cells were incubated with bile salts at a total concentration of 100  $\mu$ mol/L with a differential molar ratio for 24 h. *CYP7A1* (A) and *SHP* (B) mRNA was quantified using qRT-PCR. Values represent means  $\pm$  SD (4 biological replicates from 2 independent experiments); n.s., not significant ( $p > 0.05$ ).

**Supplementary Table S1. NAFLD activity score.**

| <b>NASH activity score (range)</b> | <b>Sham</b> | <b>MCD</b> | <b>BDL</b> | <b>MCD+BDL</b> |
|------------------------------------|-------------|------------|------------|----------------|
| Steatosis (0-3)                    | 0 (0-0)     | 3 (3-3)    | 0 (0-0)    | 0 (0-1)        |
| Lobular inflammation (0-3)         | 1 (1-1)     | 1 (1-1)    | 1 (1-1)    | 1 (1-1)        |
| Hepatocellular ballooning (0-2)    | 0 (0-0)     | 0 (0-0)    | 0 (0-0)    | 0 (0-1)        |
| Total score (0-8)                  | 1 (1-1)     | 4 (4-4)    | 1 (1-1)    | 2 (1-2)        |

NAFLD activity scores demonstrate that none of the animals met the histological criteria for NASH diagnosis, which requires a total score  $\geq 5$ . The validated scoring system as described by Kleiner et al. [4] was applied. Scores are shown as median (range) for  $n = 5-6$  animals per group.

**Supplementary Table S2. Primers used for qRT-PCR.**

| Target         | Species | Accession no. | Direction | Sequence                   |
|----------------|---------|---------------|-----------|----------------------------|
| <i>Gapdh</i>   | Rat     | NM_017008.3   | Forward   | acatcatcccctgcatccactgg    |
|                |         |               | Reverse   | catacttggcaggtttctccagg    |
| <i>Cyp7a1</i>  | Rat     | NM_012942.1   | Forward   | gcagcctctgaagaagtgagtgg    |
|                |         |               | Reverse   | gatgctgtctagtaccggcagg     |
| <i>Shp</i>     | Rat     | NM_057133.1   | Forward   | gctagaggaaccaacagtgg       |
|                |         |               | Reverse   | cctggcacatctgggtgaaga      |
| <i>Fxr</i>     | Rat     | NM_021745.1   | Forward   | gtcatcctctctccagacagaca    |
|                |         |               | Reverse   | ggtgaatgtccggagtctgtc      |
| <i>Ntcp</i>    | Rat     | NM_017047.1   | Forward   | tgaacctcagcatcgtgatgacc    |
|                |         |               | Reverse   | ggacgatccctatggtgcaagg     |
| <i>Oatp1a1</i> | Rat     | NM_017111.1   | Forward   | ctggaaccaacatgggttttcagg   |
|                |         |               | Reverse   | gtactgcagcctgttggcacac     |
| <i>Oatp1a4</i> | Rat     | NM_131906.1   | Forward   | ctctatgaaggggttcagcacc     |
|                |         |               | Reverse   | caaggcaggctgacatgtatgc     |
| <i>Oatp1b2</i> | Rat     | NM_031650.2   | Forward   | cgagcactaggagggttctagc     |
|                |         |               | Reverse   | gcctacatgcaccacgtttcc      |
| <i>Bsep</i>    | Rat     | NM_031760.1   | Forward   | ctctgcttgcctttccagg        |
|                |         |               | Reverse   | agagaccaccctgaaaacgtgg     |
| <i>Mrp2</i>    | Rat     | NM_012833.1   | Forward   | gagtctgaggatgaatctcgacc    |
|                |         |               | Reverse   | tgccctatgctcagggttcacc     |
| <i>Mrp3</i>    | Rat     | NM_080581.1   | Forward   | atgctggcctaaatgcggttgc     |
|                |         |               | Reverse   | ccaggagcccttgcagtattcc     |
| <i>Mrp4</i>    | Rat     | NM_133411.1   | Forward   | gttctggcaaagaccttgatgc     |
|                |         |               | Reverse   | ccgtgtattcaatcaccctctcc    |
| <i>GAPDH</i>   | Human   | NM_002046.5   | Forward   | catcaccatcttccaggag        |
|                |         |               | Reverse   | tgcccacagccttggcagc        |
| <i>CYP7A1</i>  | Human   | NM_000780     | Forward   | N.A. (cat. no. QT00005726) |
|                |         |               | Reverse   |                            |
| <i>SHP</i>     | Human   | NM_021969     | Forward   | N.A. (cat. no. QT00061460) |
|                |         |               | Reverse   |                            |

Sequences were designed using genomic and cDNA data obtained from GenBank (NCBI). Human *CYP7A1* and *SHP* primers were from Qiagen (QuantiTect Primer Assay). Sequences that were not available from the manufacturer are designated as N.A.

## References

- [1] Kunne, C. et al. Defective bile salt biosynthesis and hydroxylation in mice with reduced cytochrome P450 activity. *Hepatology* **57**, 1509-1517 (2013).
- [2] Slijepcevic, D. et al. Impaired uptake of conjugated bile acids and hepatitis b virus pres1-binding in na(+) -taurocholate cotransporting polypeptide knockout mice. *Hepatology* **62**, 207-219 (2015).
- [3] Kloek, J. J. et al. Cholestasis is associated with hepatic microvascular dysfunction and aberrant energy metabolism before and during ischemia-reperfusion. *Antioxid. Redox Signal.* **17**, 1109-1123 (2012).
- [4] Kleiner, D. E. et al. Design and validation of a histological scoring system for nonalcoholic fatty liver disease. *Hepatology* **41**, 1313-1321 (2005).
